# Supplementary material
Source: MDPI journal article supplement (https://www.mdpi.com/2071-1050/12/21/8865)
Supplement: s1 [file s1]

## Sheet: Sheet1
STEM teaching project title	School location	Project leader's gender	Teaching grade	Integrated STEM subjects	Teaching methods	Premise	Theme
Water pollution and water filter system	Lao Cai	Female	9	Physic - Chemistry - Techical Design - Informatics	Inquiry and design based learning	Real world problem	Water treatment and saving
Electricity circuit from fruits and vegetables	Can Tho	Male	9	Physics - Biology - Informatics - Technical design - Math	Inquiry and design based learning	Real world problem	Renewable energy
Travel binocular	Can Tho	Female	12	Physics - Informatics - Technical design - Math	Inquiry and design based learning	Real world problem	Daily life use item
Mini water filter pitcher	Can Tho	Female	11	Physics - Chemistry - Informatics - Math	Inquiry and design based learning	Real world problem	Water treatment and saving
Natural yogurt process	Can Tho	Female	9	Biology - Informatics - Math	Inquiry and experiment based learning	Real world problem	Food safety, security and nutrition
Preparing natural fermented vegetable	Can Tho	Female	9	Biology - Chemistry - Informatics - Math	Inquiry and experiment based learning	Real world problem	Food safety, security and nutrition
Understanding waste and creating household mini garbage disposal	Can Tho	Male	10	Biology - Chemistry - Informatics - Math	Problem and collaborative based learning	Real world problem	Waste management
Simple hydraulic compressor	Can Tho	Male	8	Physics - Informatics - Technical design - Math	Inquiry and experiment based learning	Scientific theory	Scientific inquiry
Mobile charger using heat	Dak Lak	Male	9	Physics - Informatics - Technical design - Math	Inquiry and design based learning	Real world problem	Renewable energy
Water distillation process	Dak Lak	Male	6	Physics - Chemistry - Informatics - Math	Inquiry and design based learning	Real world problem	Water treatment and saving
Designing and installing automatic Door Opening/Closing System when it's dark	Hai Phong	Female	11	Physics - Informatics - Technical design - Math	Inquiry and design based learning	Real world problem	Daily life use item
Seawater to freshwater	Hanoi	Female	6	Physics - Chemistry - Informatics - Math	Inquiry and design based learning	Real world problem	Water treatment and saving
Photosynthesis lamp for plant growth	Hanoi	Male	12	Physics - Biology - Informatics - Technical design - Math	Inquiry and design based learning	Real world problem	Food safety, security and nutrition
Water pollution and water pollution detector	Hanoi	Male	11	Physic - Chemistry - Techical Design - Informatics	Inquiry and design based learning	Real world problem	Water treatment and saving
Amazing seesaws and hats for children	Hanoi	Female	12	Physics - Informatics - Technical design - Math	Inquiry and design based learning	Real world problem	Recycle material
Smart cane for the visually impaired	Hanoi	Female	10	Physics - Informatics - Technical design - Math	Inquiry and design based learning	Real world problem	Daily life use item
Design air conditioning machine with recycled materials	Hanoi	Female	8	Physics - Informatics - Technical design - Math	Inquiry and design based learning	Real world problem	Recycle material
Structures and processes of viral replication	Hanoi	Female	10	Biology - Informatics - Math	Inquiry and experiment based learning	Real world problem	Health
Smart mouse trap	Hanoi	Female	10	Physics - Informatics - Technical design - Math	Inquiry and design based learning	Real world problem	Daily life use item
Designing house model	Hanoi	Male	11	Physics - Geography - Informatics - Math	Inquiry and design based learning	Real world problem	Energy saving
Making paper box according to optimal requirements	Hanoi	Male	12	Physics - Informatics - Technical design - Math	Inquiry and experiment based learning	Scientific theory	Daily life use item
Balance toys for kids from recycle material	Hanoi	Female	10	Physics - Informatics - Technical design - Math	Inquiry and design based learning	Real world problem	Recycle material
Sponge cutting machine	Ho Chi Minh	Female	9	Physics - Informatics - Technical design - Math	Inquiry and design based learning	Real world problem	Daily life use item
Producing natural beverages from fermented fruits	Ho Chi Minh	Male	11	Biology - Chemistry - Informatics - Math	Inquiry and experiment based learning	Real world problem	Food safety, security and nutrition
Growing hydroponic vegetables using recycle objects	Ho Chi Minh	Female	11	Biology - Chemistry - Informatics - Math	Problem and collaborative based learning	Real world problem	Food safety, security and nutrition
Dien Bien Phu Battle	Ho Chi Minh	Female	12	History - Physcis - Informatics	Inquiry and design based learning	Scientific theory	Scientific inquiry
Designing mini air conditioner	Ho chi Minh	Female	9	Physics - Informatics - Technical design - Math	Inquiry and design based learning	Real world problem	Energy saving
Triangle shelf for personal belongings	Ho Chi Minh	Female	7	Physics - Informatics - Technical design - Math	Inquiry and design based learning	Real world problem	Daily life use item
Color of life	Ho Chi Minh	Female	12	Biology - Chemistry - Informatics - Math	Inquiry and experiment based learning	Real world problem	Scientific experiment
Growing crystals	Ho Chi Minh	Female	10	Chemistry - Informatics - Math	Inquiry and experiment based learning	Scientific theory	Scientific experiment
Making natural fermenting vinegar and wine	Ho chi Minh	Female	9	Chemistry - Informatics - Math	Inquiry and experiment based learning	Real world problem	Food safety, security and nutrition
Designing parabolic gate	Ho chi Minh	Female	9	Physics - Informatics - Technical design - Math	Inquiry and experiment based learning	Scientific theory	Daily life use item
Isometric process	Ho Chi Minh	Female	10	Physics - Informatics - Technical design - Math	Inquiry and experiment based learning	Scientific theory	Scientific experiment
Creating volcanic models and volcanic eruptions	Ho Chi Minh	Female	6	Physics - Geography - Informatics - Math	Inquiry based learning	Scientific theory	Scientific inquiry
Sustainable farming and bio fertilizer	Ho Chi Minh	Female	11	Biology - Chemistry - Informatics - Math	Problem and collaborative based learning	Real world problem	Sustainable agriculture
Sustainable farming and herbicides from herbs	Ho Chi Minh	Female	11	Chemistry - Informatics - Math	Problem and collaborative based learning	Real world problem	Sustainable agriculture
Processing pet food from microorganisms	Ho Chi Minh	Female	11	Biology - Informatics - Math	Inquiry and experiment based learning	Real world problem	Scientific experiment
Photosynthetic supporting system for plant	Ho Chi Minh	Female	11	Physics - Biology - Informatics - Technical design - Math	Inquiry and experiment based learning	Scientific theory	Scientific experiment
Multifunctional safe power outlet	Hung Yen	Male	8	Physics - Informatics - Technical design - Math	Inquiry and design based learning	Real world problem	Daily life use item
Yogurt production and value chain development	Hung Yen	Female	10	Biology - Chemistry - Informatics - Math	Inquiry based learning	Real world problem	Food safety, security and nutrition
Jet car	Hung Yen	Male	10	Physics - Informatics - Technical design - Math	Inquiry and design based learning	Scientific theory	Scientific experiment
Computer keyboard models	Kien Giang	Male	6	Informatics - Techical Design	Inquiry and design based learning	Real world problem	Daily life use item
Wheelbarrows carrying materials	Kien Giang	Male	8	Physics - Informatics - Technical design - Math	Inquiry and design based learning	Real world problem	Daily life use item
Anti-theft device for motorcycles	Kien Giang	Male	12	Physics - Informatics - Technical design - Math	Inquiry and design based learning	Real world problem	Daily life use item
Automatic water pump controller	Kien Giang	Male	12	Physics - Informatics - Technical design - Math	Inquiry and design based learning	Real world problem	Water treatment and saving
Designing rows for planiting trees	Kien Giang	Male	6	Biology - Informatics - Math	Problem and collaborative based learning	Real world problem	Sustainable agriculture
Creating reasonable meal for effiencient nutrition	Kien Giang	Female	8	Biology - Informatics - Math	Problem and collaborative based learning	Real world problem	Health
Growing clean sprouts at home	Kien Giang	Female	11	Biology - Chemistry - Informatics - Math	Problem and collaborative based learning	Real world problem	Food safety, security and nutrition
Digital software for grade in and calculation	Kien Giang	Female	7	Informatics - Math	Problem and collaborative based learning	Real world problem	Education management
A day in a life of an engineer	Kien Giang	Male	6	Physics - Informatics - Technical design - Math	Inquiry and design based learning	Real world problem	Scientific experiment
Hand-made natural soap	Kien Giang	Female	12	Chemistry - Informatics - Math	Inquiry and experiment based learning	Real world problem	Health
Fabrication of graphite circuits	Kien Giang	Male	9	Physic - Chemistry - Techical Design - Informatics	Inquiry and experiment based learning	Real world problem	Daily life use item
Sprayer from recycled materials	Lam Dong	Male	10	Physics - Informatics - Technical design - Math	Inquiry and design based learning	Real world problem	Recycle material
Learning and creating flood level alarm system	Lam Dong	Male	9	Physics - Geography - Informatics - Math	Inquiry and design based learning	Real world problem	Flood prediction
My computer	Lam Dong	Male	6	Informatics - Techical Design	Problem and collaborative based learning	Real world problem	Daily life use item
Periscope	Lam Dong	Male	7	Physics - Informatics - Technical design - Math	Inquiry and design based learning	Scientific theory	Scientific inquiry
Computer guard	Lam Dong	Male	9	Informatics - Math	Inquiry based learning	Real world problem	Education management
Emergency life jacket using plastic bottle	Nam Dinh	Male	8	Physics - Informatics - Technical design - Math	Inquiry and design based learning	Real world problem	Recycle material
Creating AC generator model	Nam Dinh	Female	12	Physics - Informatics - Technical design - Math	Problem and collaborative based learning	Real world problem	Energy saving
Classroom Management smart Software	Nam Dinh	Female	12	Informatics - Math	Problem and collaborative based learning	Real world problem	Education management
Learning indicators from natural ingredients	Nam Dinh	Female	11	Biology - Chemistry - Informatics - Math	Inquiry based learning	Real world problem	Food safety, security and nutrition
Water pollution and water distillers	Nghe An	Male	6	Physics - Chemistry - Informatics - Math	Inquiry and design based learning	Real world problem	Water treatment and saving
Creating bean sprouts incubating tools	Nghe An	Female	6	Biology - Informatics - Math	Problem and collaborative based learning	Real world problem	Food safety, security and nutrition
Learning water level indicator with flooding alarm	Nghe An	Male	8	Physics - Geography - Informatics - Math	Problem and collaborative based learning	Real world problem	Flood prediction
Mini race car toy from recyled material	Phu Tho	Female	11	Physics - Informatics - Technical design - Math	Inquiry and design based learning	Real world problem	Recycle material
Portable charger using clean energy	Phu Tho	Male	9	Physics - Informatics - Technical design - Math	Inquiry and design based learning	Real world problem	Renewable energy
Deisgning light sensor circuit	Phu Tho	Male	12	Physics - Informatics - Technical design - Math	Inquiry and design based learning	Real world problem	Daily life use item
School Grade management system	Phu Tho	Male	12	Informatics - Math	Problem and collaborative based learning	Real world problem	Education management
Evaporation mitigation in lake using ball mat during drought	Phu Tho	Male	12	Physics - Informatics - Technical design - Math	Problem and collaborative based learning	Real world problem	Drought mitigation
Learning dynamic properties of plants	Phu Tho	Male	11	Biology - Informatics - Math	Inquiry based learning	Real world problem	Food safety, security and nutrition
Making clean bean sprouts process at home with simple tools	Quang Ngai	Female	6	Biology - Informatics - Math	Problem and collaborative based learning	Real world problem	Food safety, security and nutrition
DC rectifier	Quang Ngai	Male	12	Physics - Informatics - Technical design - Math	Inquiry and design based learning	Scientific theory	Daily life use item
Discoloration process of flowers	Tuyen Quang	Female	6	Biology - Informatics - Math	Inquiry based learning	Scientific theory	Scientific experiment
Mini generator for energy generation	Vinh Long	Male	11	Physics - Informatics - Technical design - Math	Inquiry and design based learning	Real world problem	Renewable energy
Portable spring scales with recycled material	Vinh Long	Female	6	Physics - Informatics - Technical design - Math	Inquiry and design based learning	Real world problem	Recycle material
Designing geometric kit for the visually impaired	Vinh Long	Female	6	Informatics - Techical Design	Problem and collaborative based learning	Real world problem	Education management
The color of flowers	Vinh Long	Female	11	Biology - Chemistry - Informatics - Math	Inquiry based learning	Scientific theory	Scientific experiment
